1 **Single-Domain SARS-CoV-2 S1 and RBD Antibodies Isolated from Immunized Llama**  
2 **Effectively Bind Targets of the Wuhan, UK, and South African Strains in vitro**

3

4 Divora Yemane<sup>1\*</sup>, Ivan Lu<sup>1\*</sup>, Winson Tiahjono<sup>1</sup>, Lauren Rubidoux<sup>1</sup>, Abbas Hussain<sup>1</sup>, John C.  
5 Cancilla<sup>2</sup>, Erika Duggan<sup>2</sup>, Nathan C. Shaner<sup>1</sup>, Nobuki Nakanishi<sup>1,2</sup>, Jiwu Wang<sup>1,2</sup>

6

7 1. Allele Biotechnology and Pharmaceuticals, Inc., 6404 Nancy Ridge Drive, San Diego, CA  
8 92121

9

10 2. Scintillon Institute, 6868 Nancy Ridge Drive, San Diego, CA 92121

11

12

13 \*These authors contributed equally.

14

15 **Corresponding Author:**

16 Jiwu Wang, Ph.D.

17 [jiuwuwang@allelebiotech.com](mailto:jiuwuwang@allelebiotech.com)

18

19

20 **Key Words:** COVID-SARS-2; Single Domain Antibody; Nanoantibody; Nanobody, Variants; UK  
21 Strain; South African Strain; Antigen Test; mNeonGreen.

22 **Abstract**

23 The spreading of SARS-CoV-2 variants has become a major challenge of the current fight against  
24 the pandemic. Of particular concerns are the strains that have arisen from the United Kingdom  
25 (UK) and South Africa. The UK variant spreads rapidly and is projected to overtake the original  
26 strain in the US as early as in March 2021, while the South African variant appears to evade some  
27 effects of the current vaccines. Potential false-negative diagnosis using currently available antigen  
28 kits that may not recognize these variants could cause another wave of community infection.  
29 Therefore, it is imperative that antibodies used in the detection kits are validated for binding  
30 against these variants. Here we report that the nanoantibodies (nAbs in our terminology, also  
31 referred to as VHH fragments, single domain antibodies, nanobodies<sup>TM</sup>) that we have developed  
32 for rapid antigen detection test bind the receptor binding domain (RBD) of the S1 protein from the  
33 original COVID-SARS-2 virus as well as those from the UK and South African variants. This  
34 finding validates our antibodies used in our assay for the detection of these major variant strains.  
35

36 **Main Text**

37 We immunized a llama by repeated injections of recombinant S1 and RBD proteins. Using our  
38 nanoantibody (nAb) development pipeline that resulted in dozens of drug candidate nAbs over a  
39 decade [1], we isolated multiple families of anti-RBD nAbs that showed strong binding affinity and  
40 specificity against the RBD of the clinical strain Wuhan-Hu-1. We then characterized the  
41 properties of these nAbs through various experiments that will be published separately. We  
42 further developed a prototype rapid antigen test in the format of lateral flow assay with these nAbs  
43 using clinical samples before the spread of the current major variants.

44

45 The UK variant, also referred to as SARS-CoV-2 B.1.1.7 lineage, contains ~20 amino acid  
46 changes in total, one of which is in the RBD (N501Y) and several in the N-terminus of the S1  
47 protein. The South Africa variant, also known as B.1.351 lineage, contains N501Y and two more  
48 changes in RBD (K417N, E484K). These alterations might impact the epitope binding of  
49 conventional monoclonal antibody (mAb) pairs selected for existing antigen detection tests.  
50 Nanoantibodies, on the other hand, bind their antigens through distinct mechanism than IgG  
51 antibodies. With a size that is approximately 10x smaller than IgG, the VHH single-domain derived  
52 nAbs can insert its epitope-contacting amino acids into crevices on their antigens [2] instead of  
53 “wrapping around” exposed epitopes by a heavy chain/light chain arm pair of IgG, affording a  
54 possibility that the epitope recognition of nAbs might be less affected by individual amino-acid  
55 mutations of the variants than that of mAbs. In this report, we show that our nAbs indeed bind  
56 RBDs of both the UK and the South Africa lineages.

57

58 Recombinant RBDs of Wuhan-Hu-1 (WT), B.1.1.7 (UK), and B.1.351 (South Africa) were obtained  
59 from BEI and conjugated to Spherotech particles before flow cytometry was performed. We tested  
60 the binding ability of nAb1 and nAb2, representing two of several families of anti-SARS-CoV-2

61 nAbs that we isolated. We previously determined their dissociation constant (Kd) toward WT RBD  
62 through serial dilutions as a measure of binding affinity and found that nAb1 and nAb2 showed  
63 Kds between 6 nM to 15nM when conjugated to different fluorescent proteins. We then set to test  
64 the binding affinities of nAb1 and nAb2 towards variant RBDs as described below. To facilitate  
65 the detection of nAbs in the flowcytometry assay as well as our rapid antigen diagnostic kit, we  
66 genetically fused each nAb with mNeonGreen, the brightest monomeric fluorescent protein that  
67 we previously developed [3]. We also produced a genetic fusion protein that contains two nAb1  
68 domains linked via a linker (referred to as nAb1 dimer).

69

70 As shown in Figure 1, we found that both mNeonGreen-fused nAb1 and nAb2 bind to RBDs from  
71 all three strains above the background binding to bovine serum albumin (BSA). Note that these  
72 three RBDs when conjugated to the Spherotech beads as carrier particles have not been  
73 normalized for quantitative cross-comparison, therefore we could not conclude relative binding  
74 affinity for each RBD. More quantitative and direct comparison will be performed with additional  
75 experiments. As a control, we used the monoclonal antibody CR3022, which was originally  
76 isolated for its binding to the S protein of SARS-CoV [4] and crossreacts to SARS-CoV-2 S  
77 protein. CR3022 we obtained from R&D Systems binds to the WT RBD but not to UK or South  
78 African RBDs in our hand, despite the computational prediction that mutations on South African  
79 RBD might minimally affect CR3022 binding [5]. Interestingly but not surprisingly, nAb1 dimer  
80 binds all RBDs with affinity seemingly higher (after adjusting different fluorescent labelling) than  
81 the nAb1 monomer, indicating that the dimerization of nAb1 produces cooperative binding  
82 perhaps to RBD proteins juxtaposed on the same bead. Since individual SARS-CoV-2 virions  
83 contain  $24 \pm 9$  S protein trimers [6], such cooperative binding by the nAb dimer (and potentially  
84 trimer, data not shown) would likely increase the detection sensitivity of virus particles in antigen  
85 test kit. Incidentally, the benefit of creating nAb1 linear multimers have been independently  
86 demonstrated in their increased ability to neutralize SARS-CoV-2 infection using our human iPSC-

87 derived lung epithelial cell infection experiments, to be published elsewhere.

88

89 Ongoing testing of at least three more families of nAbs selected from immunized llama should  
90 yield additional nAbs that are potential detectors of not only the two variants tested in this study  
91 but also other variants in circulation or will arise in the future. Finally, Allele Biotech's COVID  
92 antigen rapid test, designed for both point-of-care clinical and over-the-counter home use,  
93 integrates multiple nAbs' capabilities of recognizing hundreds of binding pockets of the spike  
94 protein on the surface of virus particles, enabling detection of current and future variants and  
95 much improved sensitivity over the existing test kits.

96

## 97 **Methods**

### 98 **nAb production.**

99 The nAbs that bind to SARS-CoV-2 Wuhan RBD/S1 proteins were isolated by methods that we  
100 described in detail [1]. Briefly, a llama was repeatedly immunized with recombinant Wuhan RBD  
101 and S1 proteins obtained from BEI Resources. Several weeks after the initial injection, the blood  
102 from the llama was harvested and mRNAs isolated from an enriched lymphocyte population.  
103 Reverse transcriptase (RT)-PCR was performed using a set of primers that specifically amplify  
104 VHH domains and amplified cDNAs cloned into an M13 vector. Phage display based on enzyme-  
105 linked immunosorbent assay (ELISA) was performed in 96-well plates to isolate VHH cDNAs that  
106 specifically bind to Wuhan RBD and S1 proteins. The positive cDNAs are subcloned into an E.  
107 coli expression vector for the production of RBD/S1 nAbs.

108

### 109 **Flow cytometry using protein-conjugated beads.**

110 Bovine serum albumin (BSA) and three recombinant RBDs (Wuhan, UK, and South African) were  
111 covalently conjugated to Spherotech bead particles and flow cytometry was performed after the  
112 beads were mixed with three fluorescent labeled nAbs that we generated; S-nAb1, S-nAb2 and

113 S-nAb1 Dimer. For fluorescent labeling, S-nAb1 and S-nAb2 are genetically fused with  
114 mNeonGreen [3]. S-nAb1 Dimer is HA-tagged and detected through anti-HA mAb (Cat# IC6875G,  
115 Lot# AFFY0119021, Alexa Fluor 488, Novus Biologicals). In two control experiments (1 and 2),  
116 the secondary antibody anti-HA mAb alone and the commercially available anti-SARS-CoV-2  
117 Spike mAb (CR3022, CAT# NBP2-90980F, Lot#T2022B04-110920-F, FITC, R&D Biosystems)  
118 were tested for their ability to bind the four beads described above. Fluorescence intensity (a.u.)  
119 was adjusted per labeling methods and chromophores used in each experiment.

120

### 121 **Acknowledgment**

122 The following reagents were obtained through BEI Resources, NIAID, NIH: Spike Glycoprotein  
123 S1 Domain from SARS-Related Coronavirus 2, Wuhan-Hu-1 with C-Terminal Histidine Tag,  
124 Recombinant from HEK293 Cells, NR-53798; Spike Glycoprotein Receptor Binding Domain  
125 (RBD) from SARS-Related Coronavirus 2, Wuhan-Hu-1 with C-Terminal Histidine Tag,  
126 Recombinant from HEK293 Cells, NR-53800; Spike Glycoprotein Receptor Binding Domain  
127 (RBD) from SARS-Related Coronavirus 2, United Kingdom Variant with C-Terminal Histidine  
128 Tag, Recombinant from HEK293 Cells, NR-54004; Spike Glycoprotein Receptor Binding  
129 Domain (RBD) from SARS-Related Coronavirus 2, South Africa Variant with C-Terminal  
130 Histidine Tag, Recombinant from HEK293 Cells, NR-54005.

131

### 132 **Author Contributions Statement**

133 DY, IL, WT, LR carried out the experiments; JCC designed the solubilized version of the nAbs  
134 and nAb multimers; NCS, NN and JW designed and together with AH supervised the nAb  
135 generation experiments; ED conducted and supervised flowcytometry experiment; JW wrote the  
136 main manuscript; JCC prepared the figure; NN and JW edited the draft; JW secured and provided  
137 funding.

138

### 139 **Competing Interest**

140 DY, IL, WT, LR, AH, NCS, NN and JW are current or former employees of Allele Biotech, a US  
141 small business that commercializes nAb-based and fluorescent protein-based products, among  
142 other for-profit activities. Contribution from Scintillon to this work was paid through contracts and  
143 conducted on behalf of Allele Biotech.

144

### 145 **Data Availability**

146 Additional, related data of the present report is available from the corresponding author upon  
147 request.

148

### 149 **References**

150

- 151 1. Wong, A, Sykora, C, Rogers, L, Higginbotham, J, Wang J. Modified Nanoantibodies  
152 Increase Sensitivity in Avidin-Biotin Immunohistochemistry. 2018 **Appl**  
153 **Immunohistochem Mol Morphol.** **26**, 682-688. PMID: 28059871  
154
- 155 2. Jovcevska I & Muyidermans S. The therapeutic potential of nanobodies. 2020 **BioDrugs**  
156 **34**, 11-26 PMID: 31686399  
157
- 158 3. Shaner NC, Lambert GG, Chammass A, Ni Y, Cranfill PJ, et al., Wang J. A bright  
159 monomeric green fluorescent protein derived from Branchiostoma lanceolatum. 2013  
160 **Nat Methods.** **10**, 407-9. PMID: 23524392  
161
- 162 4. Ter Meulen J, van den Brink EN, Poon LLM, Marissen WE, et al., Human monoclonal  
163 antibody combination against SARS coronavirus: synergy and coverage of escape  
164 mutants. 2006 **PLOS Med.** **3**, e237 pmed.003023  
165
- 166 5. Cheng MH, Krieger JM, Kaynak B, Arditi M, Bahar I. Impact of South African 501.V2  
167 variant on SARS-CoV-2 spike infectivity and neutralization. A structure-based  
168 computational assessment. 2021 **bioRxiv** <https://doi.org/10.1101/2021.01.10.426143>  
169 doi:  
170
- 171 6. Ke Z, Oton J, Qu K, Cortese M, et al., Structures and distributions of SARS-CoV-2 spike  
172 proteins on intact virions 2020 **Nature** **588**, 498-502  
173

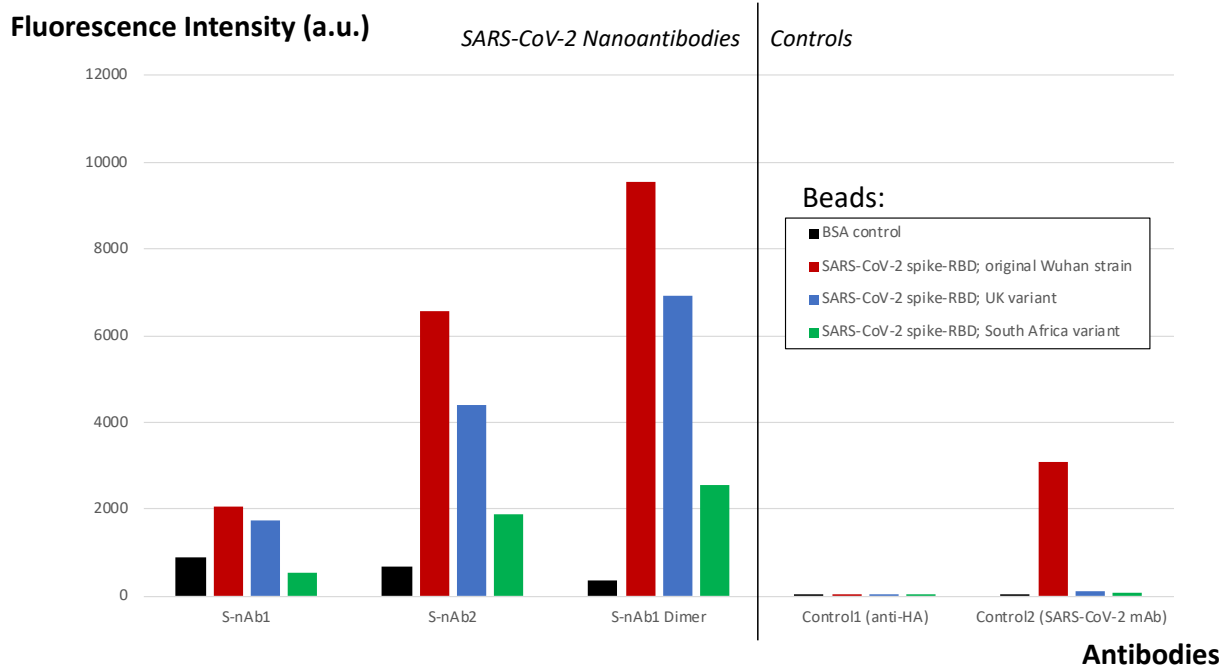

174

175 **Figure 1. Graphical representation of binding assay results obtained via flow cytometry.**

176 We evaluated the ability of nAbs to bind spike Receptor Binding Proteins (RBPs) from SARS-

177 CoV-2 Wuhan, UK and South African strains via . The results presented in the left panel indicate

178 that S-nAb1 binds to Wuhan and UK RBPs, but not to South African RBP; while S-nAb2 and S-

179 nAb1 Dimer bind to all three (Wuhan, UK, South Africa) RBPs. The right panel of the figure shows

180 two control experiments. In control 1 (negative control), the anti-HA mAb alone resulted in low or

181 no binding to BSA- or RBP- conjugated beads (within a range of 5 to 28 a.u.). In control 2, the

182 commercially available SARS-CoV-2 mAb CR3022 binds to Wuhan RBD, but not to UK or South

183 African RBPs.
